# Supplementary material for: Transcranial Direct Current Stimulation to Improve the Dysfunction of Descending Pain Modulatory System Related to Opioids in Chronic Non-cancer Pain: An Integrative Review of Neurobiology and Meta-Analysis
Source: PubMed Central journal article supplement (PMC6876542; doi:10.3389/fnins.2019.01218), 2019-11-18
Supplement: Table_1.pdf [file Table_1.pdf]

|                           |                                                   |                                                                       |                                                 |     |                                                              |                                                                         |                                                                                                                       |                                                                                                          |                                                                                                                                                                                                              |                                |
|---------------------------|---------------------------------------------------|-----------------------------------------------------------------------|-------------------------------------------------|-----|--------------------------------------------------------------|-------------------------------------------------------------------------|-----------------------------------------------------------------------------------------------------------------------|----------------------------------------------------------------------------------------------------------|--------------------------------------------------------------------------------------------------------------------------------------------------------------------------------------------------------------|--------------------------------|
| Fagerlund et al., 2015    | RCT parallel                                      | Total: <b>50</b><br>Active: 25<br>Sham: 25                            | 2mA<br>5x7 cm<br>$J = 0.057$ mA/cm <sup>2</sup> | 20' | Anodal left M1<br><br>Cathode over SO contral.               | Total: <b>5</b><br><br>Daily for 5 days                                 | Pretest<br>After day 1, 2, 3, 4 and 5<br>Posttest (after 30 days)                                                     | NRS (pain)<br>FIQ<br>HADS<br>SCL-90R<br>SF-36                                                            | Decrease in pain intensity after the 4th day of intervention, but small clinical significance. Small increase in FIQ and SCL- 90 in the active group                                                         | Active: -13.6%<br>Sham: -1.7%  |
| Jales Junior et al., 2015 | Sham-controlled RCT                               | Total: <b>20</b><br>Active:10<br>Sham: 10                             | 1mA<br>3x5cm<br>$J = 0.067$                     | 20' | Anode over left M1<br><br>Cathode over SO contral.           | Total: <b>10</b><br><br>Once/wk for 10 wks                              | Before treatm.<br>After treatm.                                                                                       | VAS pain<br>SF-36<br>FIQ<br>Tender points evaluation with algometer                                      | M1 tDCS was effective for therapeutic pain control and improved quality of life. Significant changes in imaging with decreased biparietal hypoperfusion after stimulation.                                   | Active: -40.5%<br>Sham: -16.4% |
| Khedr et al., 2017        | RCT                                               | Total: <b>36</b><br>Active: 18<br>Sham: 18                            | 2mA<br>24cm <sup>2</sup><br>$J = 0.083$         | 20' | Actv. anodal left M1<br><br>Cathode over sholder<br><br>sham | Total: <b>10</b><br><br>Daily for 10 days                               | Before treatm.<br>After 5 <sup>th</sup> sessions<br>After 10 <sup>th</sup> session<br>After 1 month<br>After 2 months | VAS pain<br>Opioid consumption and other analgesics<br>LANSS                                             | M1 tDCS was effective on all outcome measures for pain and mood; BEL increased after treatment (both anodal and sham groups) showing a negative correlation with all other outcomes in the anodal tDCS group | Active: -38.2%<br>Sham: -17.5% |
| Mendonca et al., 2016     | sham-controlled RCT in add-on to aerobic exercise | Total: <b>45</b><br>1) tDCS/AE (aerobic exerc.): 15<br>2) AE only: 15 | 2mA<br>35m <sup>2</sup><br>$J = 0.057$          | 20' | Anode over left M1<br><br>Cathode over SO contral.           | Tota: <b>5</b><br><br>Daily for 5 days<br><br>AE 3 times a wk for 4 wks | Before treatm.<br>After day 1, 2, 3 and 4                                                                             | Visual Numeric Scale (VNS) Pain<br>VNS anxiety<br>Algometer - Pressure<br>Pain Threshold<br>SF-36<br>BDI | The combination intervention had a significant effect on pain, anxiety and mood                                                                                                                              | Active: -18.0%<br>Sham: -23.5% |

|                     |                                                                                   | 3) tDCS only: 15                                                     |                                                   |     |                                                                                                                                        |                                                    |                                                                                      | Transcranial Magnetic Stimulation – cortical excitability<br>Adverse Effects                                                                                                                                                              |                                                                                                                                                                                                                             |                                                              |
|---------------------|-----------------------------------------------------------------------------------|----------------------------------------------------------------------|---------------------------------------------------|-----|----------------------------------------------------------------------------------------------------------------------------------------|----------------------------------------------------|--------------------------------------------------------------------------------------|-------------------------------------------------------------------------------------------------------------------------------------------------------------------------------------------------------------------------------------------|-----------------------------------------------------------------------------------------------------------------------------------------------------------------------------------------------------------------------------|--------------------------------------------------------------|
| To et al., 2017     | Prospective, single-blinded, placebo controlled, randomized, parallel-group study | Total: <b>42</b><br>Occipital anode: 15<br>Bifrontal: 11<br>Sham: 18 | 1.5mA<br><br>35cm <sup>2</sup><br><br>$J = 0.043$ | 20' | - Occipital: left and right C2 nerves dermatomes (i.e. left anode, right cathode)<br>- Bilateral: anode left DLPFC cathode right DLPFC | Total: <b>8</b><br>2 sessions per wk, during 4 wks | Before treatm. Immediately after treatm.                                             | NRS pain<br>PCS<br>Modified Fatigue Impact Scale                                                                                                                                                                                          | Repeated sessions of C2 tDCS significantly improved pain, but not fatigue, whereas repeated sessions of DLPFC tDCS significantly improved pain as well as fatigue                                                           | Occipital: -29.3%<br>Frontal: -32.4%<br>Sham: -8.3%          |
| Fregni et al., 2006 | Randomized, sham-controlled, parallel groups, proof of principle study            | Total: <b>31</b><br>M1: 11<br>DLPFC: 11<br>Sham: 10                  | 2mA<br><br>35cm <sup>2</sup><br><br>$J = 0.057$   | 20' | M1:<br>Anode left M1<br><br>DLPFC:<br>anode left DLPFC<br><br>Cathode SO contralat.                                                    | Total: <b>5</b><br>5 consecutive days              | Before treatment (2 wks observation)<br>After each day of treatment<br>After 21 days | VAS pain<br>Clinician global impression (CGI) and patient global assessment (PGA)<br>Number of tender points<br>FIQ<br>SF-36<br>BDI<br>VAS anxiety<br>MMSE<br>Stroop test<br>digit span forward and backward<br>Simple reaction time task | Anodal tDCS of the M1 induced significantly greater pain improvement compared with sham stimulation and stimulation of the DLPFC, still significant after 3 weeks of followup, and small positive impact on quality of life | Active (M1): -60.0%<br>Active (DLPFC): -37.5%<br>Sham: -5.4% |

|                                                        |                                              |                                                                   |                                 |     |                                                                                                              |                                                                                  |                                                                                   |                                                                                                               |                                                                                                                                                                                                                                                                                       |                                                              |
|--------------------------------------------------------|----------------------------------------------|-------------------------------------------------------------------|---------------------------------|-----|--------------------------------------------------------------------------------------------------------------|----------------------------------------------------------------------------------|-----------------------------------------------------------------------------------|---------------------------------------------------------------------------------------------------------------|---------------------------------------------------------------------------------------------------------------------------------------------------------------------------------------------------------------------------------------------------------------------------------------|--------------------------------------------------------------|
| Valle et al., 2010                                     | RCT parallel                                 | Total: <b>41</b><br>Active M1: 14<br>Active DLPFC: 13<br>Sham: 14 | 2 mA<br>5 x 7 cm<br>$J = 0.057$ | 20' | M1: anode left M1<br><br>DLPFC: anode left DLPFC<br><br>Cathode SO contralat.                                | Total: <b>10</b><br><br>For 10 consecutive days                                  | Baseline assessment<br>After end of stimulation<br>After 30 days<br>After 60 days | VAS pain<br>FIQ<br>BDI<br>STAI<br>GDS<br>MMSE<br>Adverse events                                               | Both M1 and DLPFC displayed improvements in pain and quality of life, but only M1 resulted in long-lasting clinical benefits as assessed at 30 and 60 days after the end of treatment.                                                                                                | Active (M1): -33.3%<br>Active (DLPFC): -30.0%<br>Sham: -8.9% |
| <b>Neuropathic pain</b>                                |                                              |                                                                   |                                 |     |                                                                                                              |                                                                                  |                                                                                   |                                                                                                               |                                                                                                                                                                                                                                                                                       |                                                              |
| O'Neill et al., 2018                                   | RTC crossover                                | Total: <b>21</b>                                                  | 1.4 mA<br>5x5 cm<br>$J = 0.056$ | 20' | 1) Anode over M1 contral to pain (cathode over SO)<br><br>2) Cathode over M1 contral to pain (anode over SO) | <b>Varied</b><br><br>From 0 to 7 sessions each protocol (anodal, cathodal, sham) | Last assessment: day 14th                                                         | Usability of patient-administered tDCs<br>Patient compliance with device<br>NRS pain<br>SF-36<br>HADS<br>MMSE | Did not show a beneficial effect of tDCS in pain, anxiety, depression or quality of life                                                                                                                                                                                              | Active: -5.0%<br>Cathodal: +3.8%<br>Sham: -0.4%              |
| Lewis et al., 2018<br><br>Upper limb neuropathic pain. | Double-blinded, randomized controlled trial. | Total: <b>30</b><br>Active: 13<br>Sham: 17                        | 1 mA<br>7x5 cm<br>$J = 0.029$   | 20' | Anode over left or right M1 (contral. To affect limb)<br><br>Cathode over SO contralateral                   | Total: <b>5</b><br><br>Daily for 5 days                                          | Baseline<br>After 7 days<br>After 21 days<br>After 56 days                        | BPI<br>SF-MPQ2<br>Disorders of the Arm, Shoulder, and Hand questionnaire (DASH)<br>QST                        | The outcome measures were re-assessed 1, 3, and 8 weeks following the intervention. rating. Secondary outcome measures included the BPI interference score, Short-Form McGill Pain Questionnaire 2 (SF -MPQ2), Disorders of the Arm, Shoulder, and Hand questionnaire (DASH), and QST | Active: -21.0%<br>Sham: -4.0%                                |

|                                                |                                                 |                                                                                                                              |                                                       |     |                                                                    |                                           |                                                                                                                         |                                                                                                                                |                                                                                                                                                    |                                                            |
|------------------------------------------------|-------------------------------------------------|------------------------------------------------------------------------------------------------------------------------------|-------------------------------------------------------|-----|--------------------------------------------------------------------|-------------------------------------------|-------------------------------------------------------------------------------------------------------------------------|--------------------------------------------------------------------------------------------------------------------------------|----------------------------------------------------------------------------------------------------------------------------------------------------|------------------------------------------------------------|
|                                                |                                                 |                                                                                                                              |                                                       |     |                                                                    |                                           |                                                                                                                         |                                                                                                                                | of the nociceptive system.                                                                                                                         |                                                            |
| Soler et al., 2010<br><br>Spinal cord injury   | RCT parallel                                    | Total: <b>40</b><br><br>1) active tDCS + visual illusion (VI): 10<br>2) a-tDCS: 10<br>3) sham-tDCS + VI: 9<br>4) placebo: 10 | 2 mA<br><br>35cm <sup>2</sup><br><br><i>J</i> = 0.057 | 20' | Anode over M1 left or right<br><br>Cathode over SO contral.        | Total: <b>10</b><br><br>Daily for 10 days | Before treatm. Immediately after<br>After 2 wks<br>After 4 wks<br>After 12 wks                                          | NRS pain<br>Neuropathic pain symptom inventory<br>BPI<br>NRS anxiety<br>Patient global impression of change<br>Adverse effects | Decrease in general pain intensity and in subtypes of neuropathic pain: dysaesthesias. tDCS+VI                                                     | Active (a-tDCS + VI): -30.7%<br>Sham (s-tDCS + VI): -11,1% |
| Wrigley et al., 2013<br><br>Spinal cord injury | RCT crossover                                   | Total: <b>10</b>                                                                                                             | 2 mA<br><br>5x7cm<br><br><i>J</i> = 0.057             | 20' | Anode over M1 left or right<br><br>Cathode over SO contral.        | Total: <b>5</b><br><br>Daily for 5 days   | Initial Pre-treat. During treat. 4 wks after treat. Pre-treat. (after cross-over) 4 wks after cross-over After 4 months | American Spinal Injury Association Impairment Scale<br>Neuropathic Pain Scale<br>BDI<br>Side effects                           | Not alter significantly after each of the 5 active treatment sessions as well as after 4 weeks of follow-up and 6 months of follow-up.             | Active: +5.3%<br>Sham: +2.0%                               |
| Bocci et al., 2019<br><br>Phantom limb pain    | crossover, double-blind, sham-controlled design | Total: <b>14</b>                                                                                                             | 2 mA<br><br>35cm <sup>2</sup><br><br><i>J</i> = 0.08  | 20' | Anode median line 2 cm bellow inion<br>Cathode over right shoulder | Total: <b>5</b><br><br>Daily for 5 days   | Baseline End of stimulation wk<br>After 2 wks<br>After 4 wks                                                            | VAS phantom pain, movements and sensations<br>Laser-Evoked Potentials (LEPs)                                                   | Anodal polarization significantly dampened LEP amplitudes, reduced paroxysmal pain, non-painful phantom limb sensations and phantom limb movements | Active: -41.0%<br>Sham: -5.0%                              |

|                                                       |                                            |                                                                                              |                                                                                                                                                              |        |                                                                                      |                                         |                                                                            |                                                                                                                                                            |                                                                                                                                                                                                                                                                                  |                                                               |
|-------------------------------------------------------|--------------------------------------------|----------------------------------------------------------------------------------------------|--------------------------------------------------------------------------------------------------------------------------------------------------------------|--------|--------------------------------------------------------------------------------------|-----------------------------------------|----------------------------------------------------------------------------|------------------------------------------------------------------------------------------------------------------------------------------------------------|----------------------------------------------------------------------------------------------------------------------------------------------------------------------------------------------------------------------------------------------------------------------------------|---------------------------------------------------------------|
| Kim et al., 2013 (b)<br><br>Diabetic Polyneuropathy   | Randomized, Sham Controlled Parallel Trial | Total: <b>60</b><br><br>3 groups:<br>1) tDCS M1: 20<br>2) tDCS DLPFC: 20<br>3) tDCS sham: 20 | 2mA<br><br>25cm <sup>2</sup><br><br><i>J</i> = 0.08                                                                                                          | 20'    | G1: Anode left M1 (C3)<br>G2: Anode left DLPFC (F3)<br>Cathode SO contralateral both | Total: <b>5</b><br><br>Daily for 5 days | Before treatm.<br>After day 1, 2, 3, 4 and 5<br>After 2 wks<br>After 4 wks | VAS pain<br>Clinical Global Impression (CGI)<br>BDI<br>Pain threshold (PT) using algometer<br>Glycated hemoglobin (HbA1c) concentration<br>Adverse effects | tDCS over the M1 produced immediate pain relief, and relief 2- and 4-week in duration, as well as increase in pain threshold, global impression and decrease in anxiety, sleep problems and depression. DLPFC stimulation decreased VAS and increased patient global impression. | Active (M1): -34.0%<br>Active (DLPFC): -22.0%<br>Sham: -13.5% |
| <b>Other pain syndromes</b>                           |                                            |                                                                                              |                                                                                                                                                              |        |                                                                                      |                                         |                                                                            |                                                                                                                                                            |                                                                                                                                                                                                                                                                                  |                                                               |
| Sakrajai et al., 2014<br><br>Myofascial pain syndrome | Parallel-group RCT                         | Total: <b>31</b><br><br>Active: 16<br>Sham: 15                                               | 1 mA<br><br>35cm <sup>2</sup><br><br><i>J</i> = 0.029                                                                                                        | 20 min | anodal tDCS over M1 (contralateral to the most painful side)                         | Total: <b>5</b><br><br>Daily for 5 days | Follow-up<br>After 1, 2, 3 and 4 wks                                       | NRS pain<br>Passive range of motion (PROM)<br>Analgesic medication use<br>WHOQOL – Physical functioning                                                    | tDCS combined with standard treatment appears to decrease pain intensity. Low benefit at the end of sessions and no benefit at follow-up                                                                                                                                         | Active: - 40.3%<br>Sham: -13.5%                               |
| Hagenacker et al., 2014<br><br>Trigeminal neuralgia   | RCT double-blind cross-over design         | Total: <b>10</b>                                                                             | 1.0mA<br><br>Anode: 16cm <sup>2</sup><br><i>J</i> = 0.062<br>mA/cm <sup>2</sup><br><br>Ref elct: 50cm <sup>2</sup><br><i>J</i> = 0.012<br>mA/cm <sup>2</sup> | 20'    | Anode over M1 (no side specified)<br>Ref elct: SO contralateral.                     | Total: <b>14</b><br><br>daily for 2 wks | Before treatm.<br>After treatm.                                            | Verbal Rating Scale (VRS) pain<br>Eletrophysiological:<br>- pain-related evoked potentials (PREP)<br>- nociceptive blink reflex (nBR)                      | Anodal tDCS reduced pain intensity significantly after two weeks of treatment. The attack frequency reduction was not significant. PREP showed an increased N2 latency and decreased peak-to-peak amplitude after anodal tDCS. No severe adverse events were reported.           | Active: -18.0%<br>Sham: +8.3%                                 |

|                                                                             |                                                               |                                                                                                    |                                          |     |                                                                              |                                                                                                  |                                                                                     |                                                                                                                                                                                                                                                         |                                                                                                                                                                                                                 |                                |
|-----------------------------------------------------------------------------|---------------------------------------------------------------|----------------------------------------------------------------------------------------------------|------------------------------------------|-----|------------------------------------------------------------------------------|--------------------------------------------------------------------------------------------------|-------------------------------------------------------------------------------------|---------------------------------------------------------------------------------------------------------------------------------------------------------------------------------------------------------------------------------------------------------|-----------------------------------------------------------------------------------------------------------------------------------------------------------------------------------------------------------------|--------------------------------|
| Ibrahim et al., 2018<br>Visceral pain due to Hepatocellular carcinoma (HCC) | randomized, sham-controlled, double-blind, prospective study. | Total: <b>40</b><br>Active: 20<br>Sham: 20                                                         | 2 mA<br>35cm <sup>2</sup><br>$J = 0.057$ | 30' | Anodal over M1 contral.<br>Most painful area<br><br>Cathode over SO contral. | Total: <b>10</b><br>Daily for 10 days                                                            | Before stimulation<br>After 1 day<br>After 5 days<br>After 10 days<br>After 1 month | Visual descriptor scale and VAS pain<br>HAMD<br>Side effects                                                                                                                                                                                            | VAS and VDS after the 10th session and one month later.<br>Secondary outcomes were depression reduction on HAM-D.                                                                                               | Active: -46.1%<br>Sham: -21.6% |
| Lagueux et al., 2018<br>Complex regional pain syndrome                      | randomized parallel single blind                              | Total: <b>22</b><br><br>Graded motor imagery (GMI) intervention + Active: 11<br><br>GMI + sham: 11 | 2 mA<br>5X7 cm<br>$J = 0.057$            | 20' | Anode over M1 contralat. to affected limb<br>Cathode over SO contralat.      | Total: <b>14</b><br>5 sessions/day for 2 wks and 1 session/day for 4 wks, all of them during GMI | Baseline<br>After 6 wks of treatment<br>1 month after the end of treatment          | BPI-short form<br>SF-12<br>Tampa Scale of kinesiophobia (TSK)<br>PCS<br>STAI<br>BDI-II<br>Measures of compliance, adverse effects and blinding                                                                                                          | GMI + tDCS induced no statistically significant reduction in pain compared to GMI + sham tDCS. Significant group differences in kinesiophobia, pain catastrophizing and anxiety at T1, but not maintained at T2 | Active: -12.5%<br>Sham: -14.5% |
| Luedtke et al., 2015<br>Chronic low back pain                               | sham controlled double blinded randomised controlled trial    | Total: <b>135</b><br>Active: 67<br>Sham: 68                                                        | 2mA<br>35cm <sup>2</sup><br>$J = 0.057$  | 20' | Anode over left M1<br><br>Cathode SO contralat.                              | Total: <b>5</b><br>Daily for 5 days before CBT                                                   | Before treatm.<br>After treatm.<br>After 4 wks<br>After 12 wks<br>After 24 wks      | VAS (pain)<br>Oswestry disability index<br>Hannover functional ability questionnaire<br>Bothersomeness<br>RAND 36-item health survey<br>Fear avoidance beliefs questionnaire<br>Hospital anxiety and depression score<br>Patient perceived satisfactory | tDCS was ineffective for reduction of pain and disability and did not influence the outcome of cognitive behavioural management                                                                                 | Active: -12.5%<br>Sham: -14.6% |

|                                                                  |                                                   |                                                                       |                                                |     |                                                           |                                                                                           |                                                                                          |                                                                                                                                                                                                                                         |                                                                                                                                                                                                             |                                |
|------------------------------------------------------------------|---------------------------------------------------|-----------------------------------------------------------------------|------------------------------------------------|-----|-----------------------------------------------------------|-------------------------------------------------------------------------------------------|------------------------------------------------------------------------------------------|-----------------------------------------------------------------------------------------------------------------------------------------------------------------------------------------------------------------------------------------|-------------------------------------------------------------------------------------------------------------------------------------------------------------------------------------------------------------|--------------------------------|
|                                                                  |                                                   |                                                                       |                                                |     |                                                           |                                                                                           |                                                                                          | improvement                                                                                                                                                                                                                             |                                                                                                                                                                                                             |                                |
| Oliveira et al., 2015<br><br>chronic temporomandibular disorders | Double-blinded parallel randomised clinical trial | Total: <b>32</b><br><br>Active + exercises: 16<br>Sham + exercise: 16 | 2 mA<br><br>No info of electr. size            | 20' | Anode M1 contral. to pain<br><br>Cathode SO contralat.    | Total: <b>5</b><br><br>Daily for 5 days after exercises for cervical and mandibular areas | Before treatm.<br>After each day of treatm.<br>After 2 wks<br>After 3 wks<br>After 4 wks | VAS pain severity of Temporomandibular disorder questionnaire (da Fonseca)<br>WHOQOL-BREF<br>Pressure pain threshold with algometer                                                                                                     | Groups showed a decrease in pain intensity scores and increase in pressure pain threshold and quality of life, although there were no differences between the groups, indicating no additive effect of tDCS | Active: -49.1%<br>Sham: -42.8% |
| Silva-Filho et al., 2018<br><br>Chikungunya arthralgia           | Parallel, sham, randomized, double-blind          | Total: <b>19</b><br><br>Active: 9<br>Sham: 10                         | 2mA<br><br>35cm <sup>2</sup><br><br>J = 0.057  | 20' | Anode left M1<br><br>Cathode SO contralat.                | Total: <b>5</b><br><br>Daily for 5 days                                                   | Before treatm.<br>After 1 day<br>After 5 days<br>After 1 wk                              | VAS pain<br>MPQ<br>BPI (short form)<br>Hand grip test (with dynamometer)<br>Upper and lower limbs flexion strength tests<br>SF-36                                                                                                       | Significant reduction of quality of pain and pain felt on average and at the moment of assessment (post-treatment), as well as reduction of the impact of pain in general activities and normal work        | Active: -74.5%<br>Sham: -39.3% |
| Morin et al., 2017<br><br>Provoked vestibulodynia                | RCT parallel                                      | Total: <b>39</b><br><br>Active: 19<br>Sham: 20                        | 2mA<br><br>35 <sup>2</sup> cm<br><br>J = 0.057 | 20' | Anode M1 (no side specified)<br><br>Cathode SO contralat. | Total: <b>10</b><br><br>Consecutive sessions daily, for 2 wks                             | Before treatment<br>After treatment<br>After 2 wks                                       | Verbal numeric scale – pain<br>MPQ<br>Female sexual function index<br>Female sexual distress scale<br>Global measure of sexual satisfaction<br>patient treatment satisfaction and impression of change<br>Vaginal penetration cognition | No effects of tDCS in reducing pain during intercourse, vestibular sensitivity, or psychological distress, and to improve sexual function                                                                   | Anodal: -16.8%<br>Sham: -24.0% |

|                                                   |                  |                  |                                                                                               |     |                                              |                                         |                                                                                                                                   |                                                                                                |                                                                                                                                                                                                                             |                           |
|---------------------------------------------------|------------------|------------------|-----------------------------------------------------------------------------------------------|-----|----------------------------------------------|-----------------------------------------|-----------------------------------------------------------------------------------------------------------------------------------|------------------------------------------------------------------------------------------------|-----------------------------------------------------------------------------------------------------------------------------------------------------------------------------------------------------------------------------|---------------------------|
|                                                   |                  |                  |                                                                                               |     |                                              |                                         |                                                                                                                                   | questionnaire<br>PCS<br>IDATE<br>Pain anxiety<br>symptoms scale<br>BDI                         |                                                                                                                                                                                                                             |                           |
| Antal et al.,<br>2010<br><br>Various<br>syndromes | RTC<br>crossover | Total: <b>12</b> | 1mA<br><br>Anode: 4 x 4 cm<br><i>J</i> = 0.062<br><br>Cathode: 5 x<br>10cm<br><i>J</i> = 0.02 | 20' | Anode M1<br>left<br>Cathode SO<br>contralat. | Total: <b>5</b><br><br>Daily for 5 days | Before treatm.<br>(between 10<br>days)<br>After each day<br>of treatm.<br>After 1 wk<br>After 2 wks<br>After 3 wks<br>After 4 wks | VAS pain<br>Transcranial magnetic<br>stimulation – cortical<br>excitability<br>Adverse effects | Anodal tDCS led to a greater<br>improvement in VAS ratings<br>than sham<br>tDCS, evident even three to four<br>weeks post-treatment.<br>Decreased intracortical<br>inhibition was demonstrated<br>after anodal stimulation. | Anodal: -35%<br>Sham: -1% |

Notes. RCT = randomized clinical trial; *J* = current density; M1 = primary motor area; DLPFC = dorsolateral prefrontal cortex; SO = supraorbital region; Oz = occipital region; Cz = vertex region; VAS = visual analogue scale; NRS = numeric rating scale; FIQ = Fibromyalgia Impact Questionnaire; HADS = Hospital Anxiety and Depression Scale; SC-90R = Symptom Checklist - 90 – Revised; SF-26 = Medical Outcomes Study 36 - Item Short - Form Health Survey; LANSS = The Leeds Assessment of Neuropathic Symptoms and Signs; BDI = Beck Depression Inventory; PCS = Pain Catastrophizing Scale; STAI = State-Trait Anxiety Inventory; GDS = Geriatric Depression Scale; MMSE = Mini-mental State Exam; BPI = Brief Pain Inventory; QST = Quantitative Sensory Testing; WHOQOL = World Health Organization Quality Of Life instrument; HAMD = Hamilton Depression Rating Scale; MPQ = McGill Pain Questionnaire.
